# Supplementary material for: Tuning of energy levels, transport properties and device performance of naphthalenediimide derivatives by introduction of Michael addition reaction
Source: Royal Society of Chemistry journal article supplement (doi:10.1039/d2nj01979e), 2022-01-01
Supplement: d2nj01979e1.pdf [file d2nj01979e1.pdf]

## Supporting information

# Tuning of energy levels, transport properties and device performance of naphthalenediimide derivatives by introduction of Michael addition reaction

Mehak Ahuja,<sup>1#</sup> Saurabh K. Saini<sup>2#</sup>, Neeraj Chaudhary<sup>1</sup>, Mahesh Kumar<sup>2</sup>, Rajiv K. Singh<sup>1</sup> and Rachana Kumar<sup>\*1</sup>

<sup>1</sup>Photovoltaic Metrology Group, Advanced Materials and Devices Metrology Division, CSIR-National Physical Laboratory, National Measurement Institute of India, Dr. K. S. Krishnan Marg, New Delhi, India-110012

<sup>2</sup>Photonics Materials Metrology Group, Advanced Materials and Devices Metrology Division, CSIR-National Physical Laboratory, Dr. K. S. Krishnan Marg, New Delhi 110012, India.

<sup>#</sup>Academy of Scientific and Innovative Research (AcSIR), Ghaziabad- 201002, Uttar Pradesh, India

\*Corresponding author

E-mail: [rachanak@nplindia.org](mailto:rachanak@nplindia.org); [rachanasinghchem@gmail.com](mailto:rachanasinghchem@gmail.com)

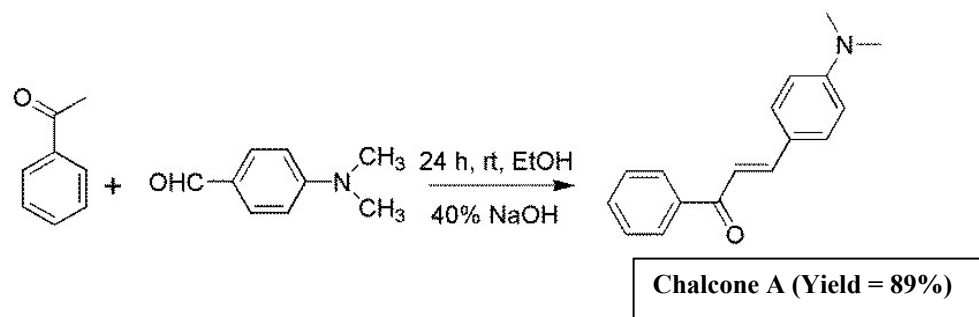

Figure S1(a). General synthesis scheme of chalcone A.

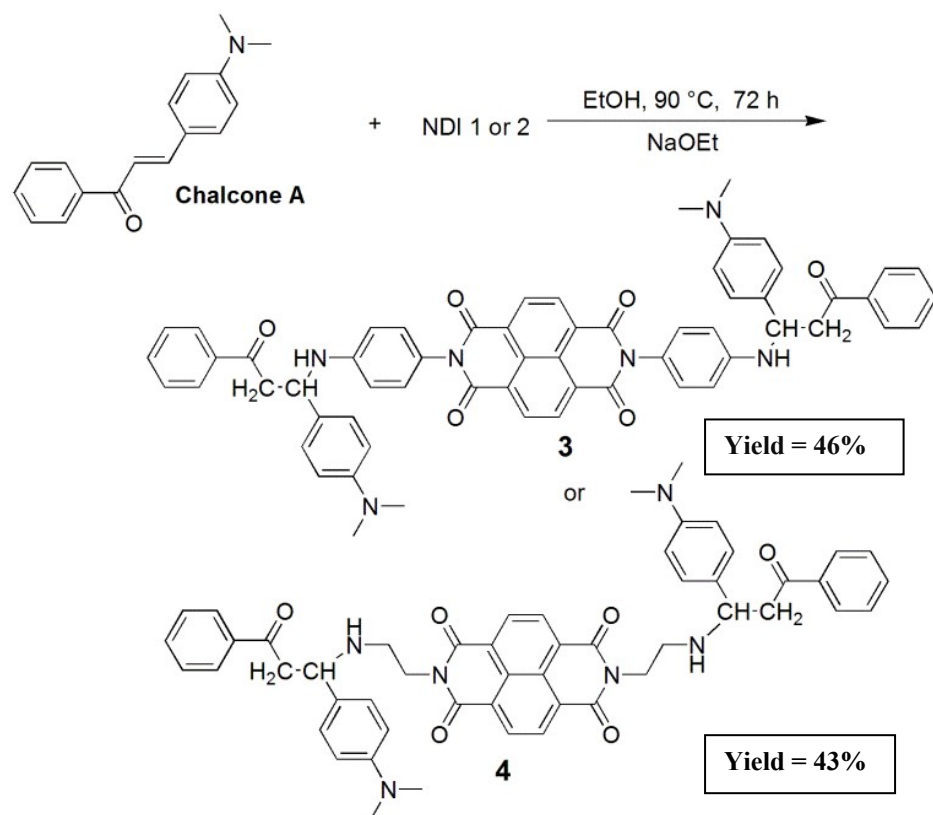

Figure S1(b). Synthesis scheme of Michael addition products **3** and **4** from 0.022 mM chalcone A and 0.022mM NDI in the presence of EtOH with NaOEt as catalyst.

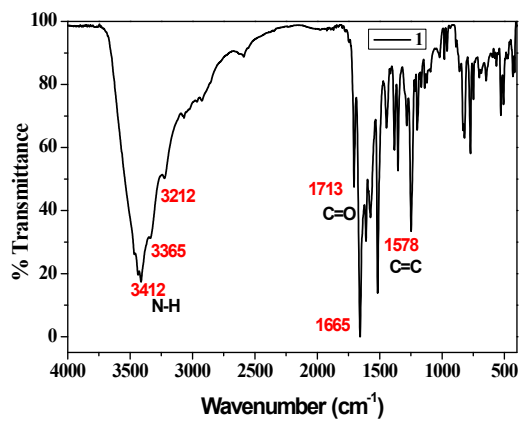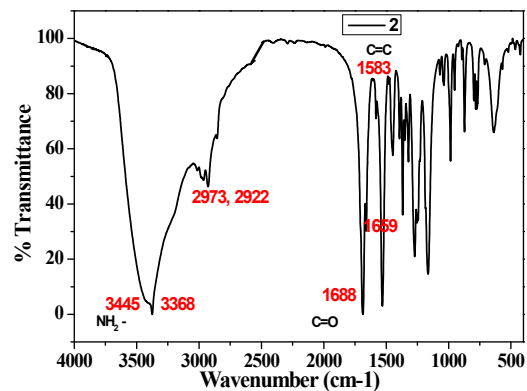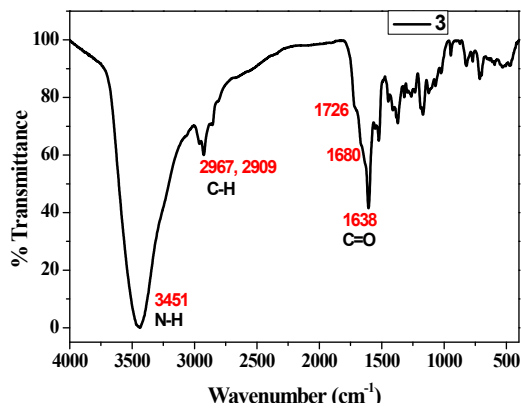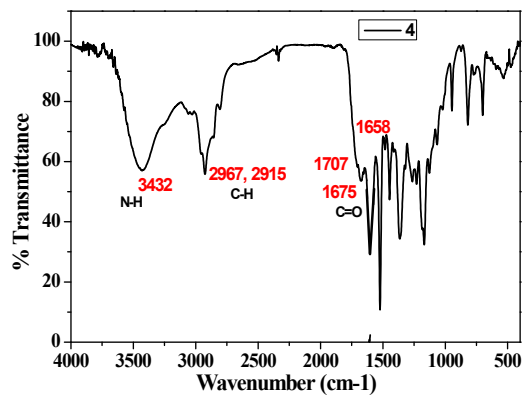

Figure S2(a). FTIR spectra of products 1, 2, 3 and 4.

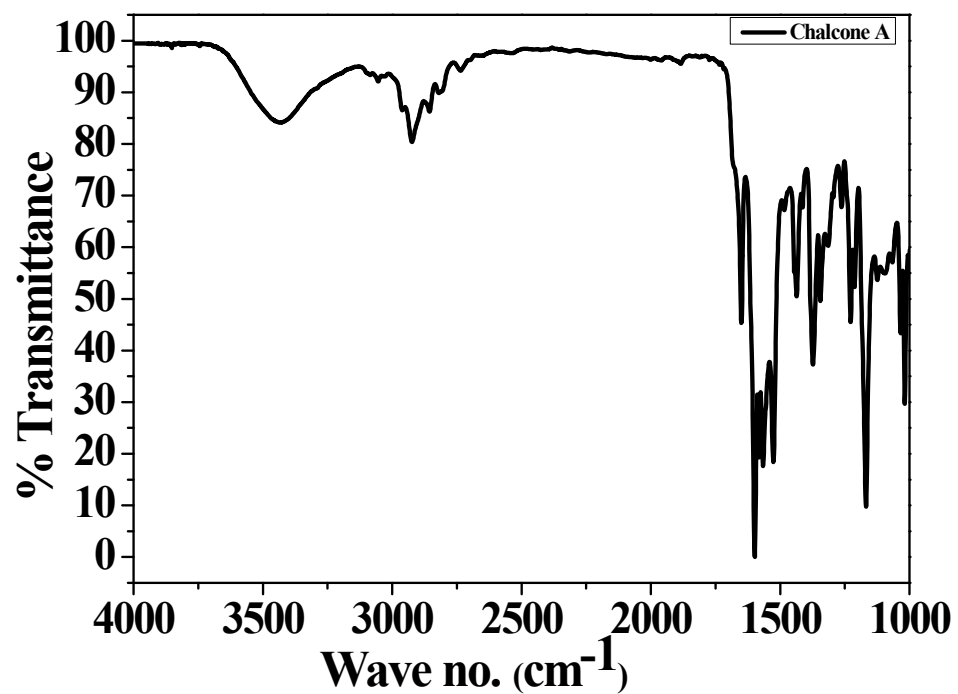

Figure S2 (b). FTIR spectrum of chalcone A

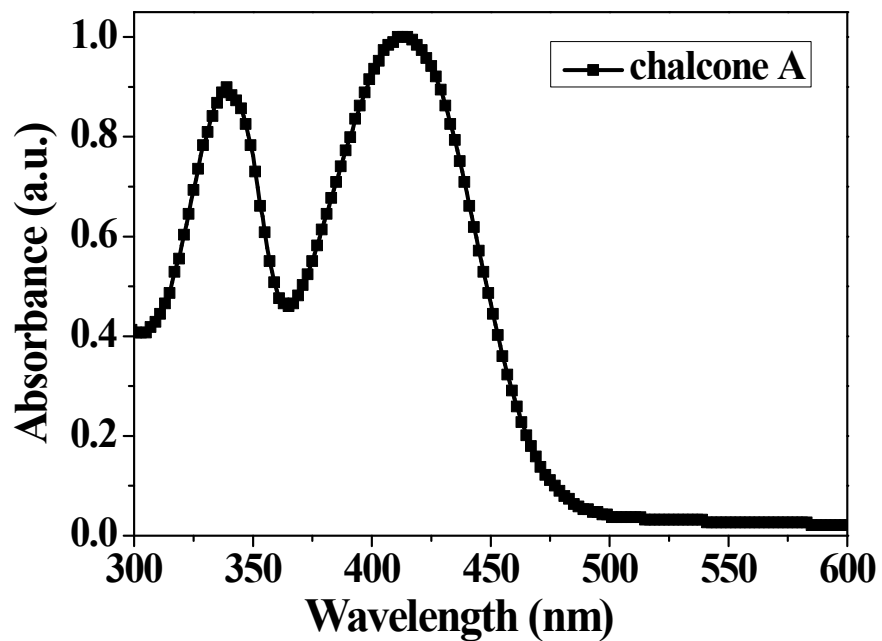

Figure S3. UV-Visible absorption spectrum of chalcone A

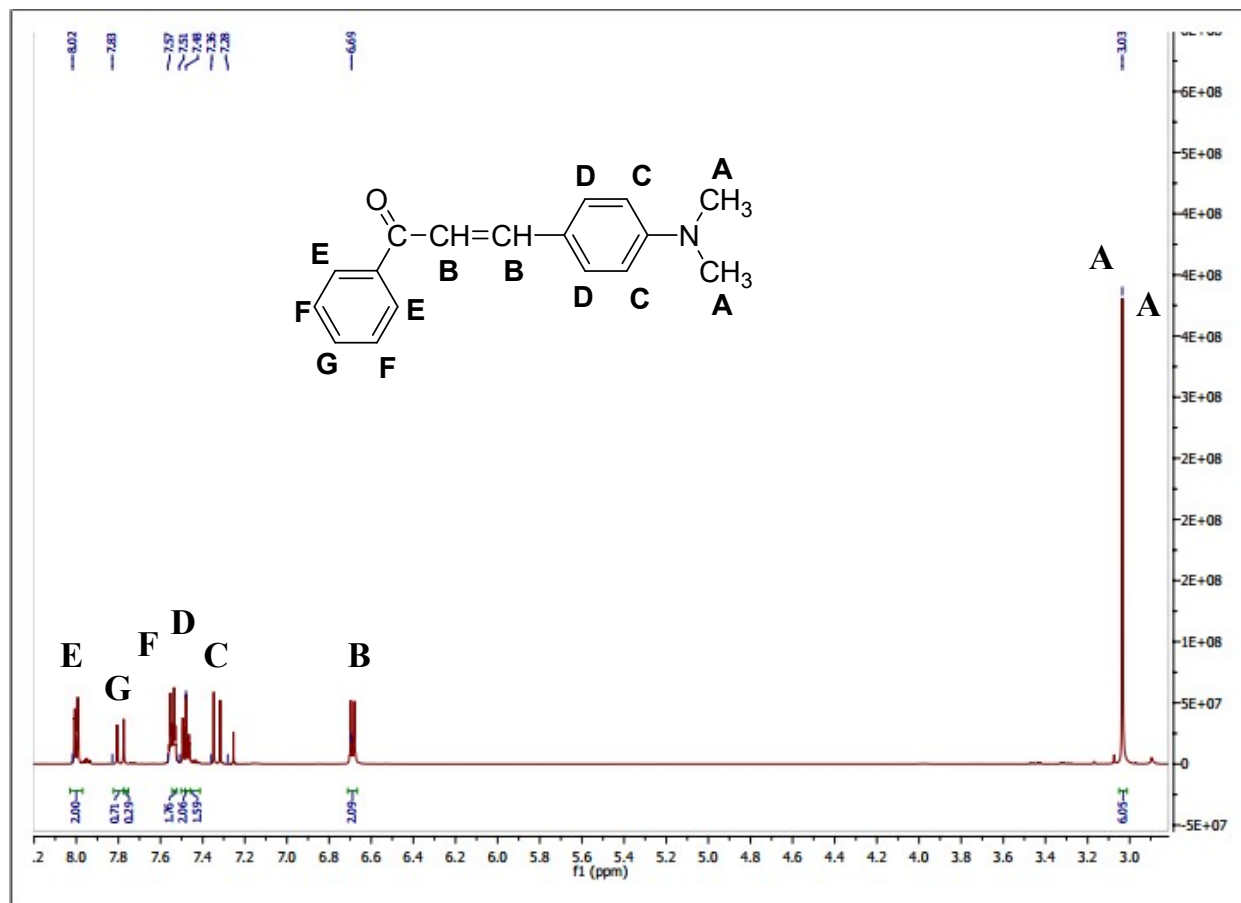

Figure S4. <sup>1</sup>H NMR spectrum of chalcone A

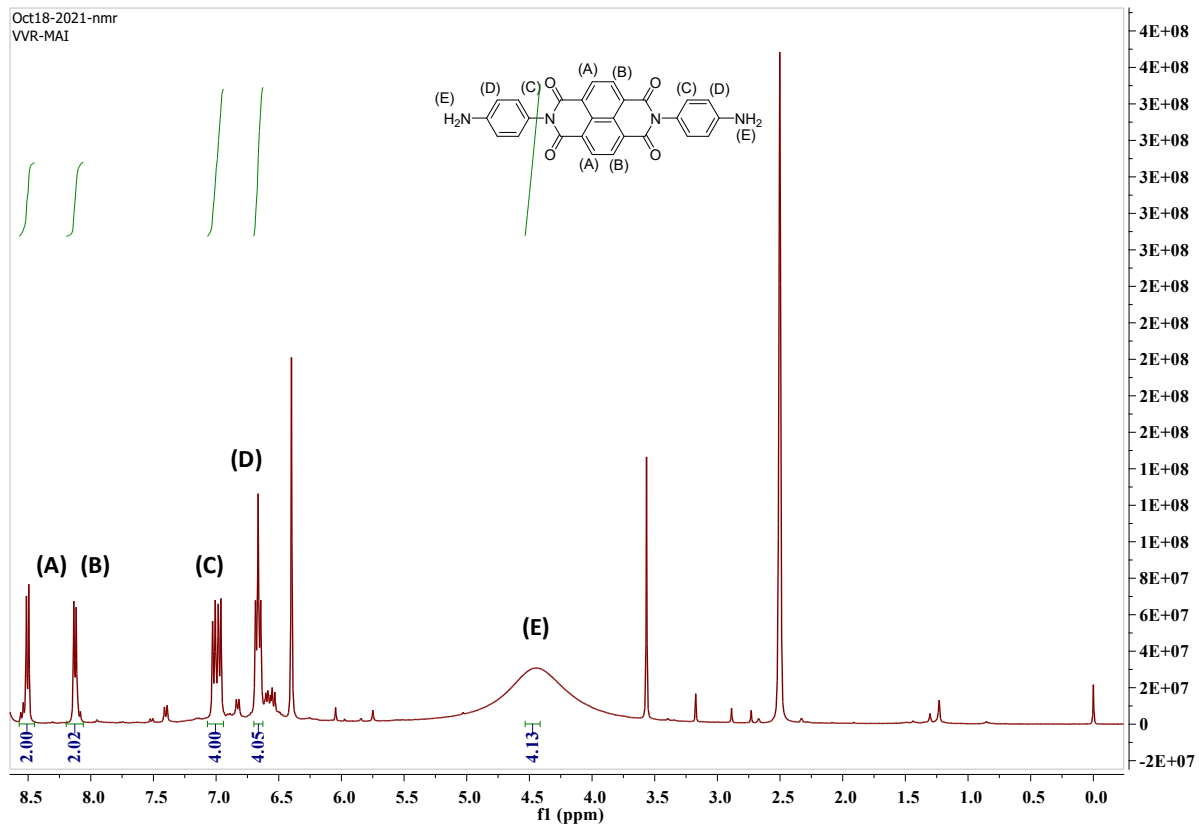

Figure S5.  $^1\text{H}$  NMR spectrum of 1

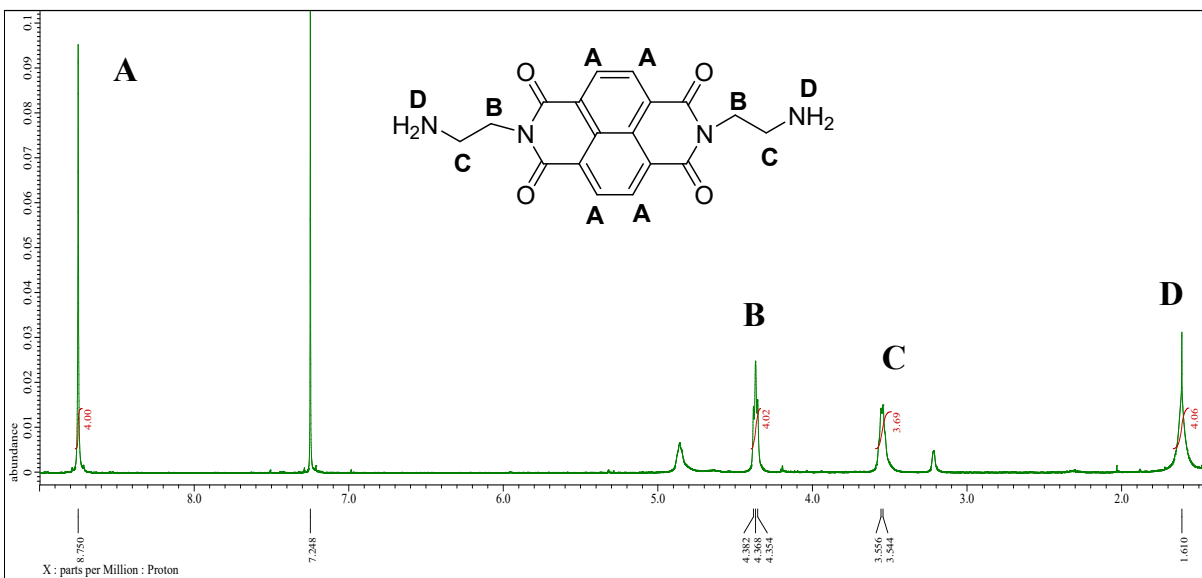

Figure S6.  $^1\text{H}$  NMR spectrum of 2

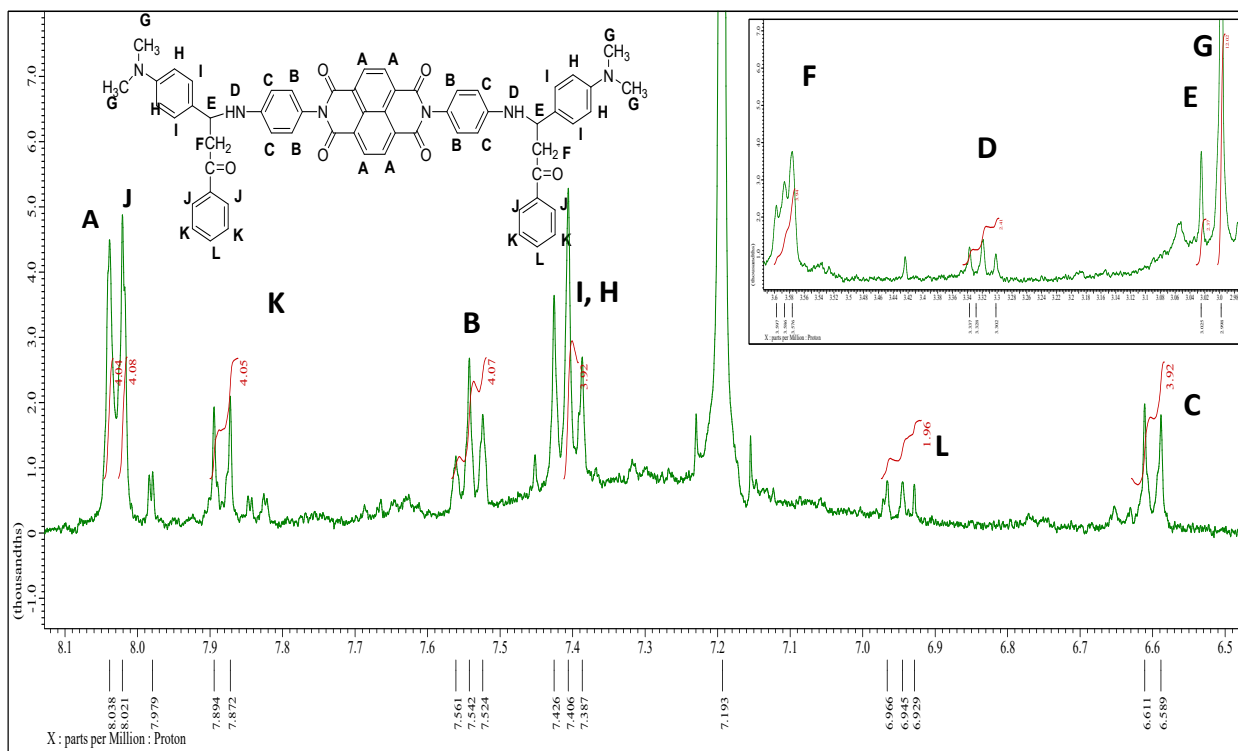

Figure S7.  $^1\text{H}$  NMR spectrum of product 3

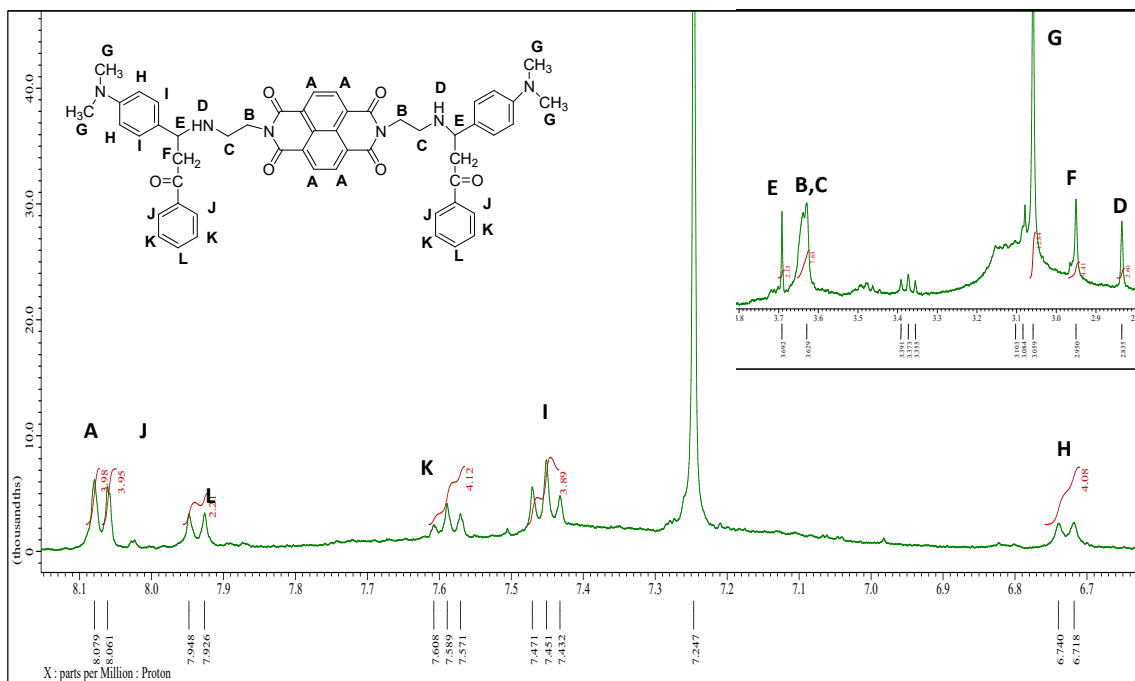

Figure S8.  $^1\text{H}$  NMR spectrum of product 4

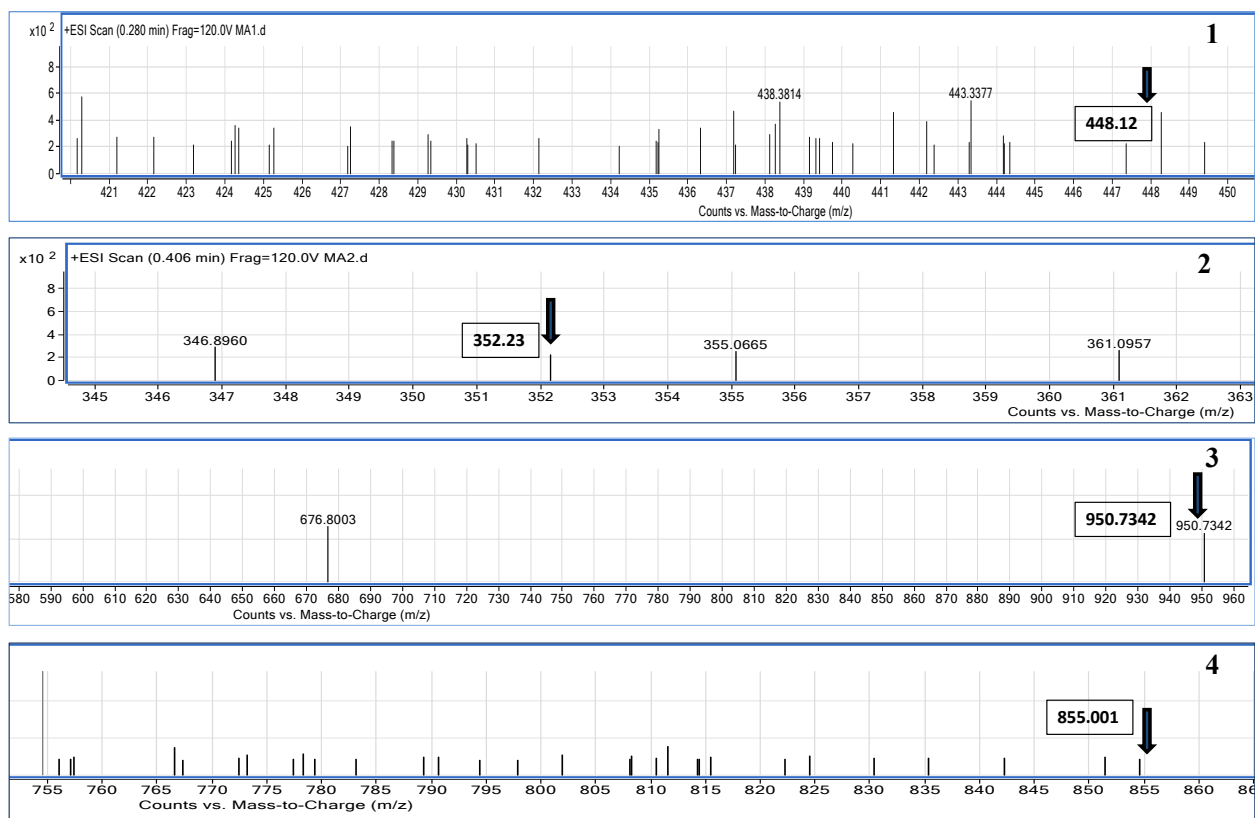

Figure S9. Mass spectrum analysis of products **1**, **2**, **3** and **4**.

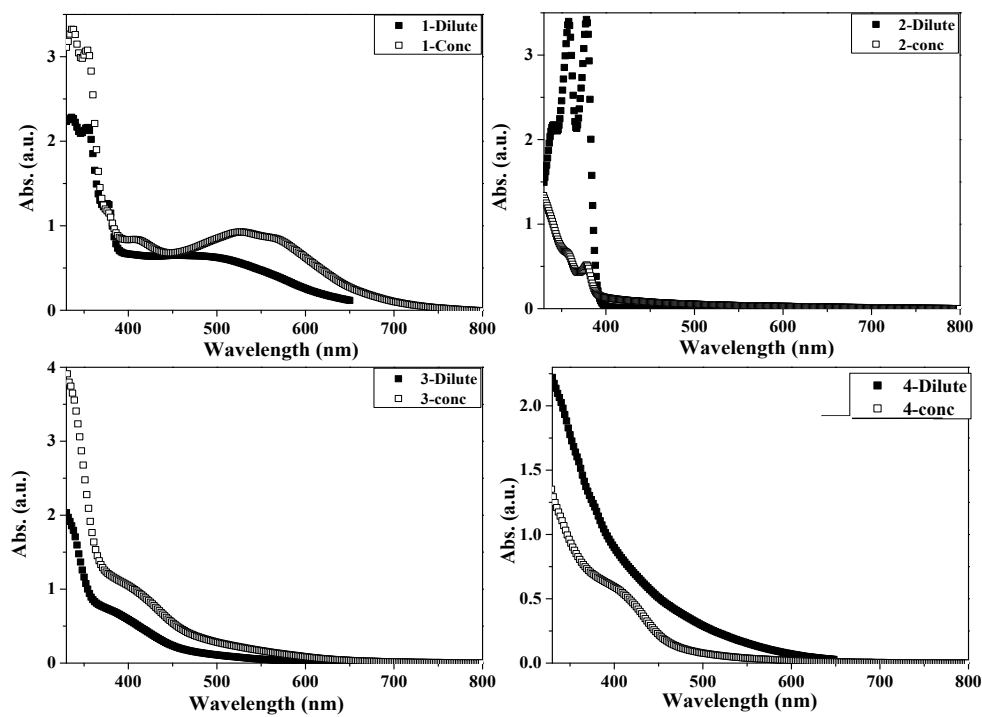

Figure S10. Comparative absorption spectra of the products **1**, **2**, **3** and **4** in THF for dilute ( $1 \mu\text{M}$ ) and concentrated ( $1\text{mM}$ ) solutions.



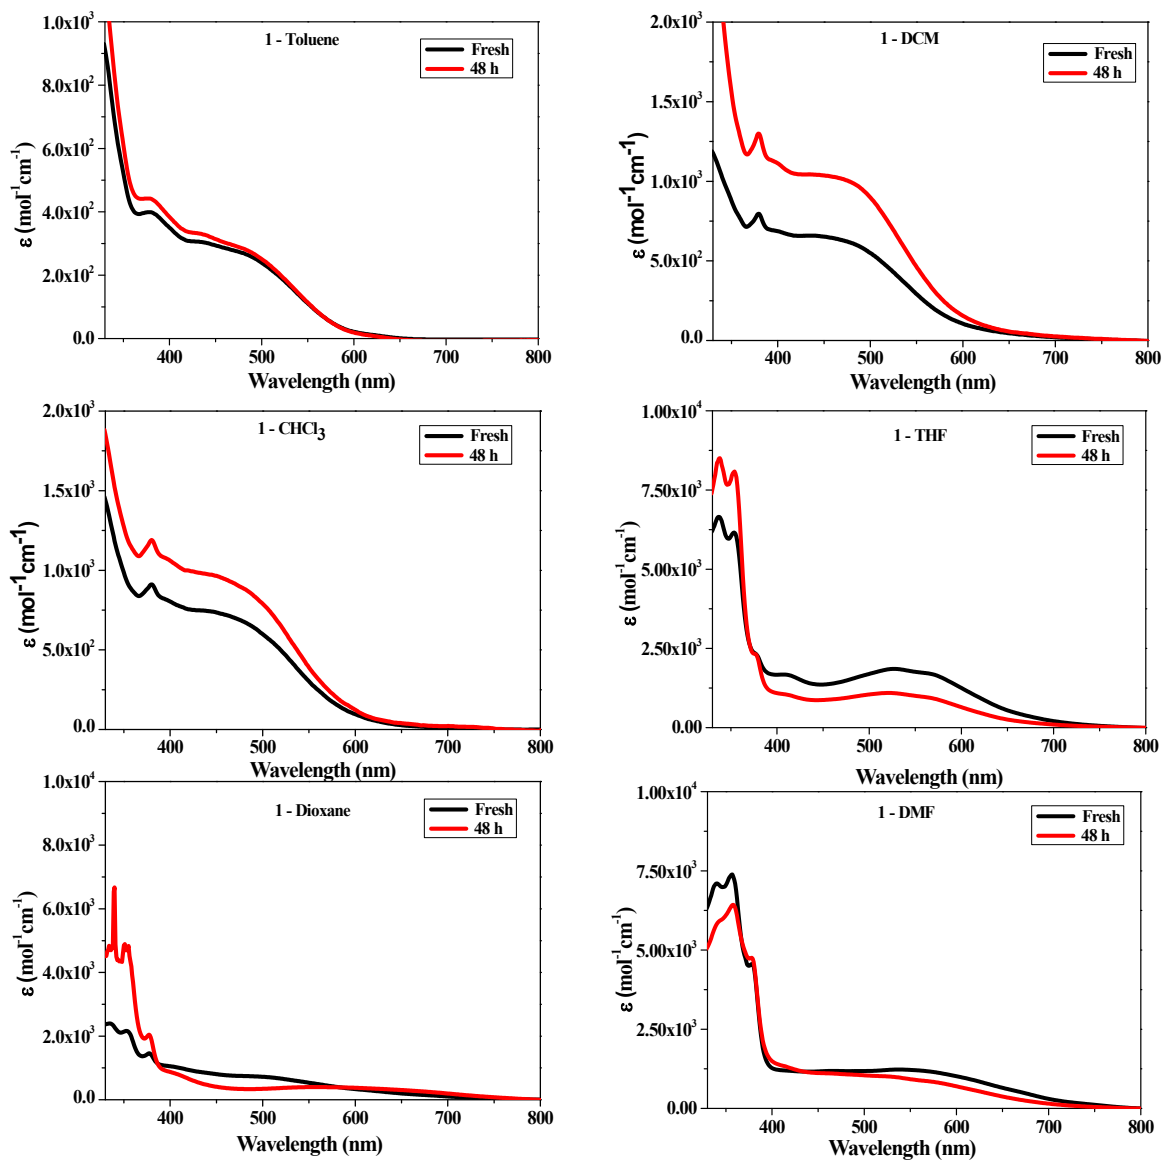

Figure S11. UV-Vis absorption of 1 (fresh and 48 h aged) in different solvents

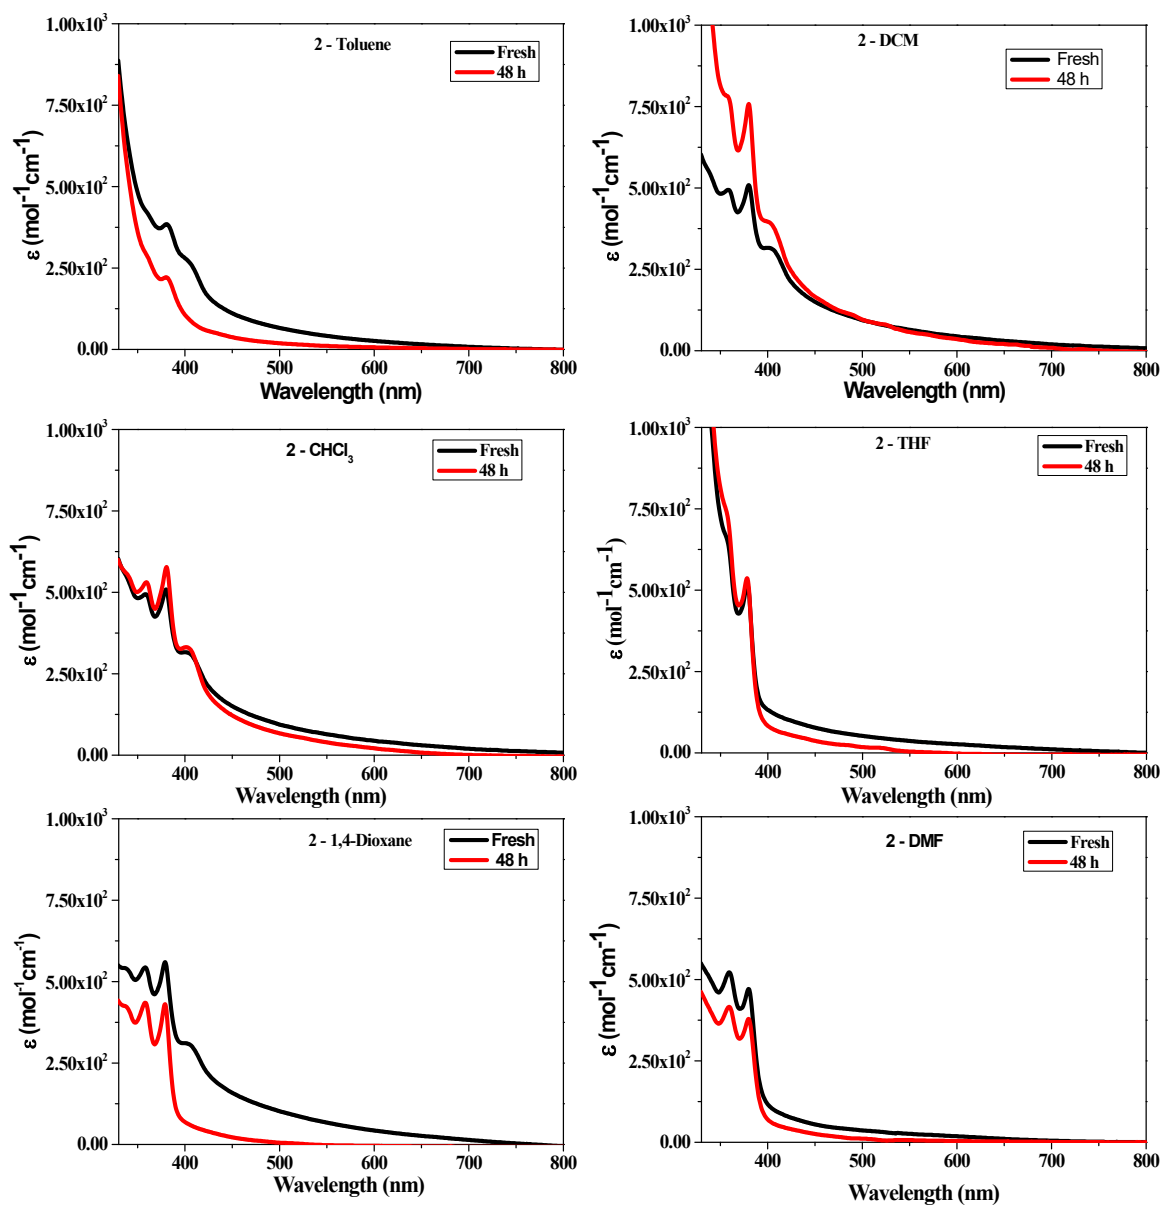

Figure S12. UV-Vis absorption of 2 (fresh and 48 h aged) in different solvents.

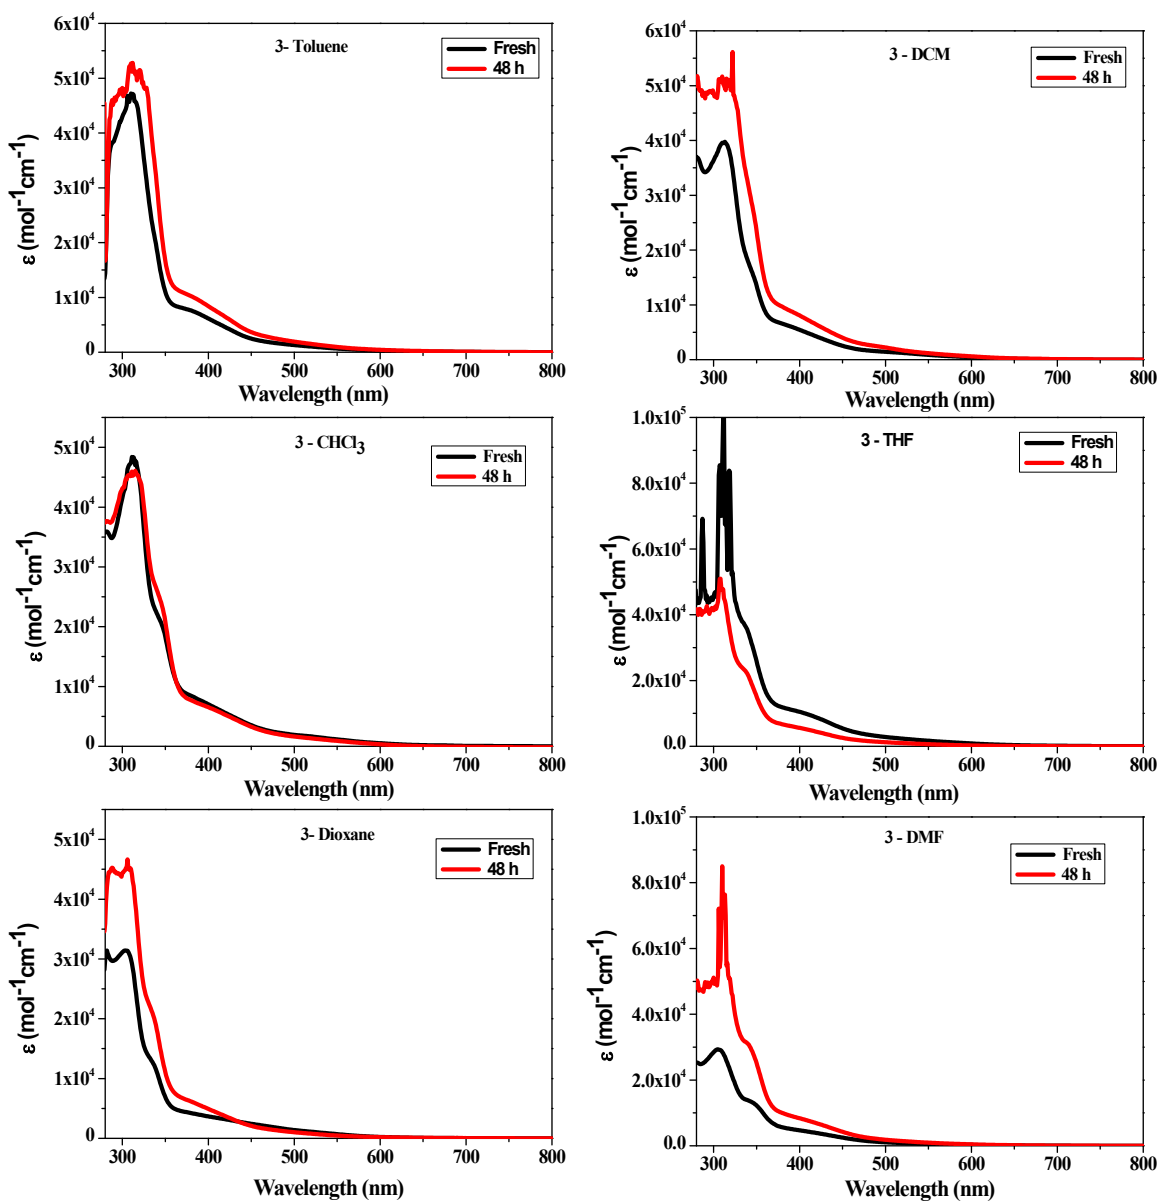

Figure S13. UV-Vis absorption of 3 (fresh and 48 h aged) in different solvents.

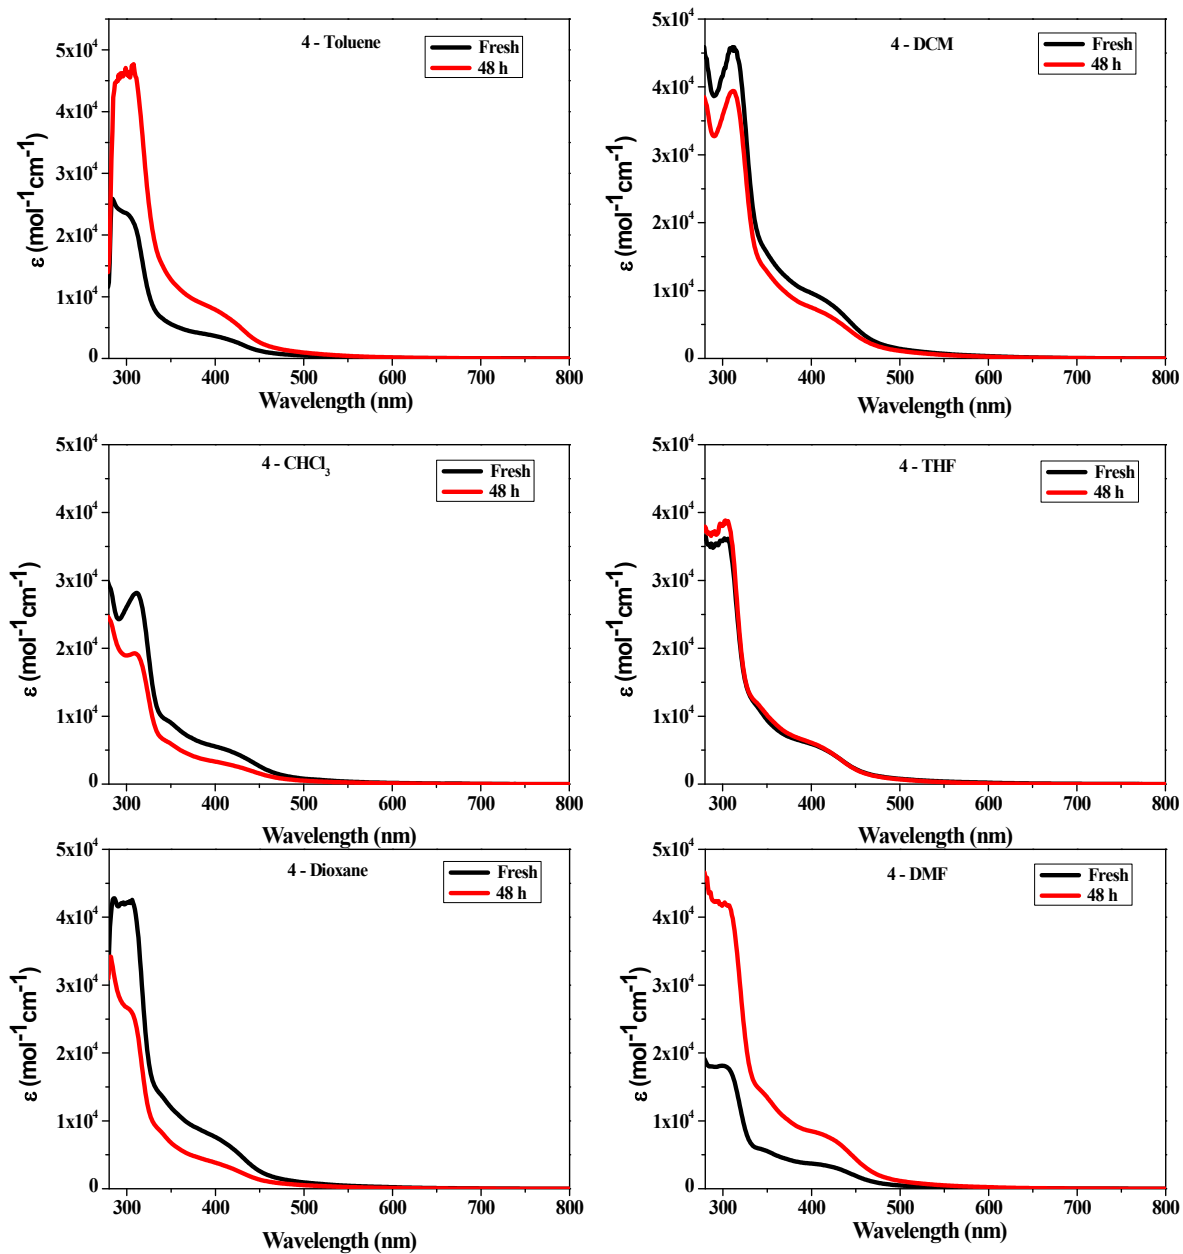

Figure S14. UV-Vis absorption of fresh and 48 h aged samples of 4 in different solvents

Table S1. Position of absorption maximum of 1, 2, 3 and 4 in different solvents in their fresh and 48 h aged samples

| <b>1</b>     | <b>toluene</b> | <b>DCM</b>          | <b>CHCl<sub>3</sub></b> | <b>THF</b>          | <b>Dioxane</b>  | <b>DMF</b>          |
|--------------|----------------|---------------------|-------------------------|---------------------|-----------------|---------------------|
| <b>fresh</b> | 319,379        | 319,379,<br>467     | 319,379,<br>467         | 335,378,<br>412,526 | 335,377,<br>500 | 338,379,<br>549     |
| <b>48 h</b>  | 319,382        | 316,379,<br>480     | 317,377,<br>480         | 337,377,<br>543     | 339,377,<br>589 | 339,357,<br>380,552 |
| <b>2</b>     | <b>toluene</b> | <b>DCM</b>          | <b>CHCl<sub>3</sub></b> | <b>THF</b>          | <b>Dioxane</b>  | <b>DMF</b>          |
| <b>fresh</b> | 381            | 340,358,<br>378,401 | 336,357,<br>378         | 356, 378            | 336,358,<br>378 | 359, 379            |
| <b>48 h</b>  | 379            | 359,<br>381, 406    | 337,<br>357,<br>380,403 | 357, 377            | 337,360,<br>379 | 359, 380            |
| <b>3</b>     | <b>toluene</b> | <b>DCM</b>          | <b>CHCl<sub>3</sub></b> | <b>THF</b>          | <b>Dioxane</b>  | <b>DMF</b>          |
| <b>fresh</b> | 311,378        | 311,347,<br>439     | 310,348,<br>397         | 305,336,<br>392     | 302,335,<br>410 | 305,347,<br>410     |
| <b>48 h</b>  | 321,388        | 309,320,<br>485     | 313,348,<br>397         | 312,341,<br>424     | 306,338,<br>397 | 315,342,<br>413     |
| <b>4</b>     | <b>toluene</b> | <b>DCM</b>          | <b>CHCl<sub>3</sub></b> | <b>THF</b>          | <b>Dioxane</b>  | <b>DMF</b>          |
| <b>fresh</b> | 296,396        | 310,414             | 311,351,<br>418         | 304,341,<br>406     | 306,341,<br>402 | 302,343,<br>419     |
| <b>48 h</b>  | 306,407        | 312,417             | 311,347,<br>422         | 306,341,<br>406     | 305,344,<br>408 | 306,343,<br>427     |

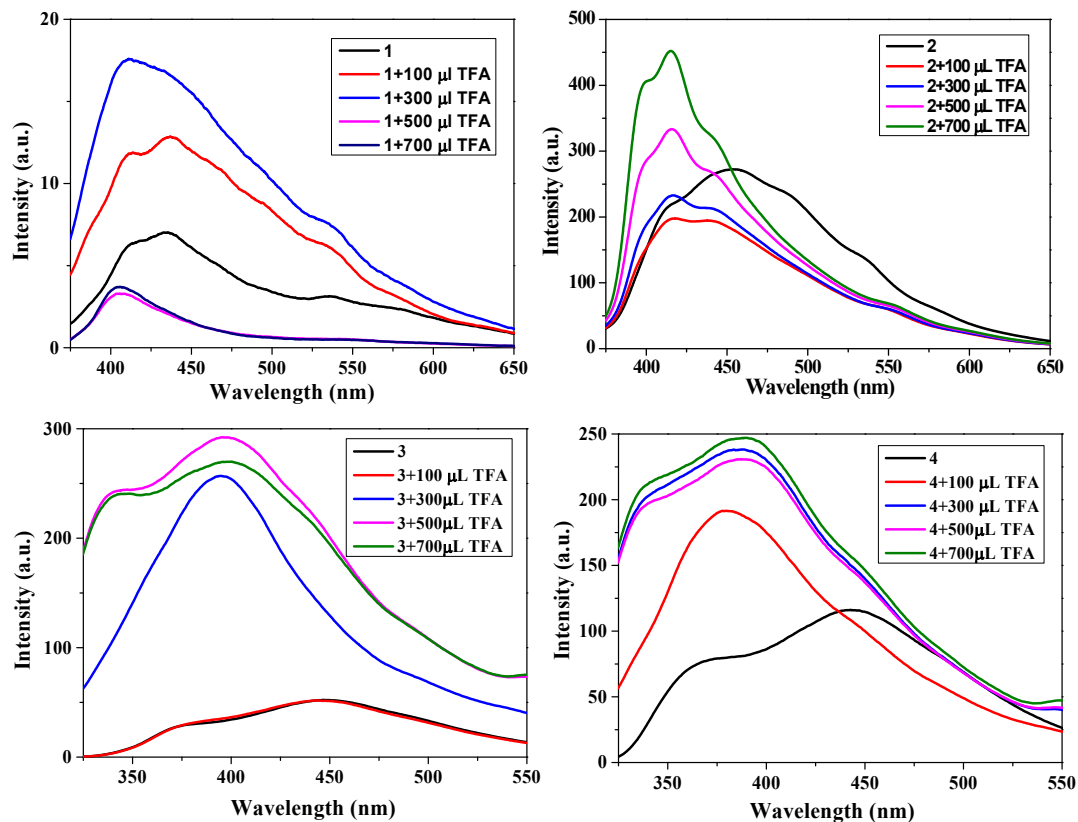

Figure S15. PL spectra of products in chloroform with addition of TFA.

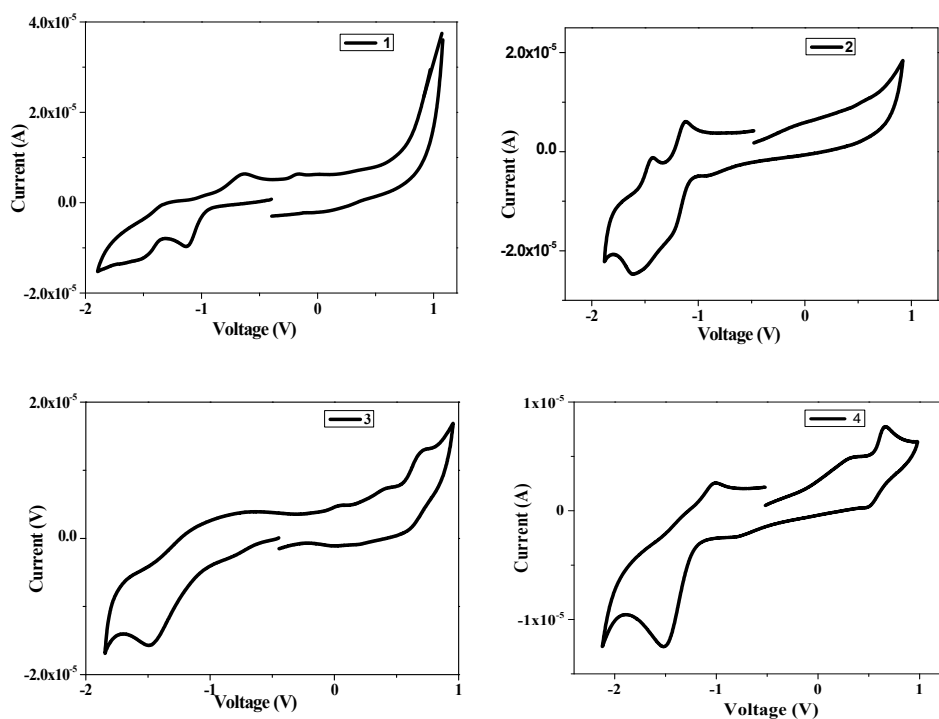

Figure S16. Cyclic voltammograms of 1, 2, 3 and 4 for the determination of HOMO-LUMO energy levels.

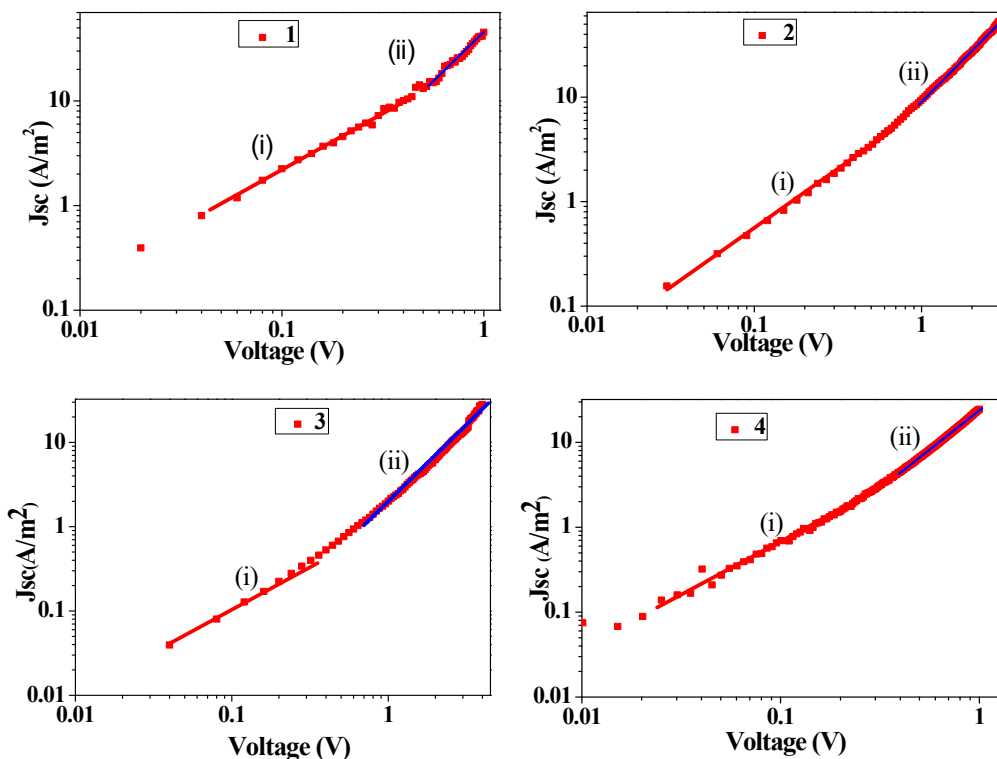

Figure S17. SCLC electron mobility measurement curves for 1, 2, 3 and 4.

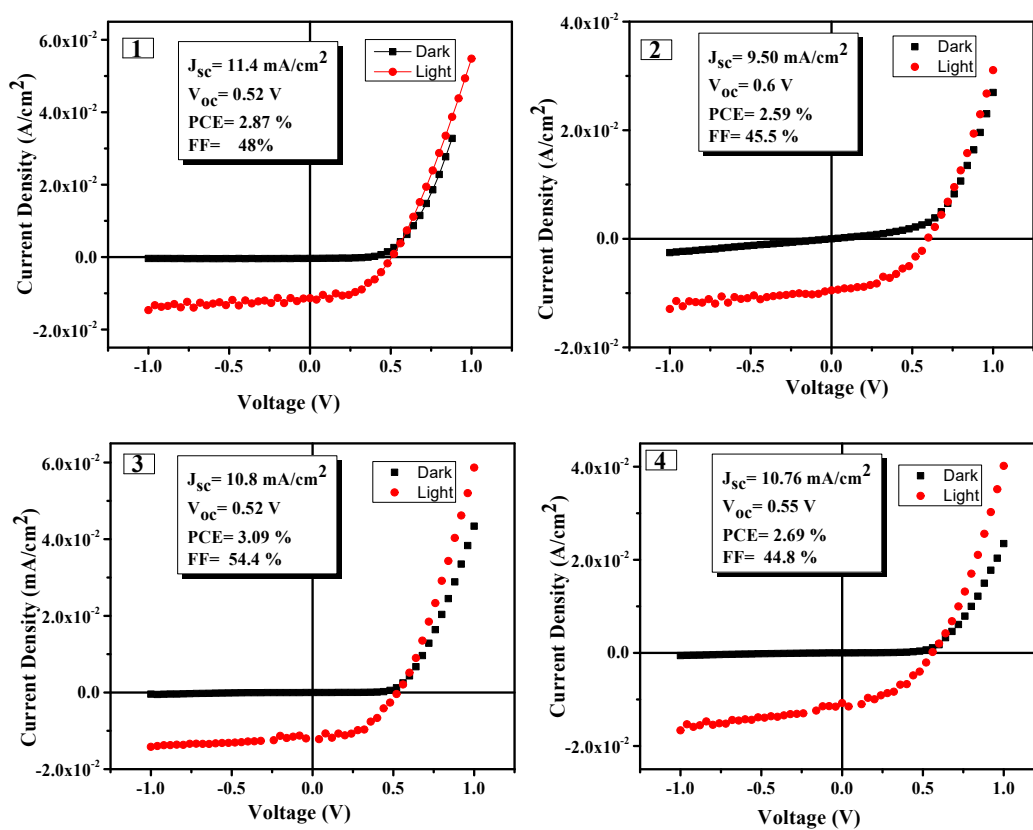

Figure S18. J-V characteristics of the Champion cell for products 1, 2, 3 and 4 with their Photovoltaic parameters  $J_{sc}$  (short-circuit current density),  $V_{oc}$  (open-circuit voltage), FF (fill factor), and PCE (power conversion efficiency) in the inset.

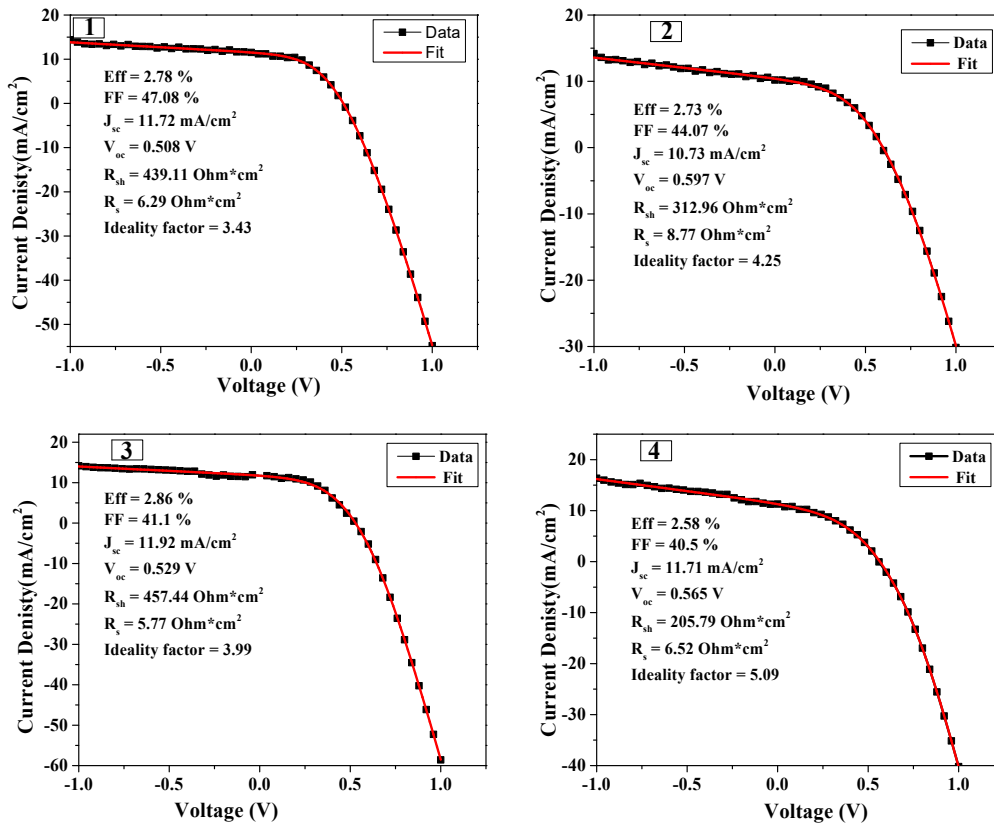

Figure S19. J-V characteristics of 1, 2, 3 and 4 devices with theoretical fitting showing  $J_{sc}$ ,  $V_{oc}$ , FF, PCE, ideality factor, shunt and series resistance.

Table S2. Photovoltaic parameters for 1

| Conc.   | Spin coating(rpm) | $J_{sc}$<br>(mA/cm <sup>2</sup> ) | $V_{oc}$<br>(mV) | FF   | PCE<br>(%) |
|---------|-------------------|-----------------------------------|------------------|------|------------|
| 3 mg/mL | 1000              | 11.4                              | 0.52             | 0.48 | 2.87       |
|         |                   | 10.8                              | 0.52             | 0.45 | 2.54       |
|         |                   | 10.4                              | 0.52             | 0.48 | 2.61       |
| 5 mg/mL | 1000              | 8.80                              | 0.51             | 0.33 | 1.52       |
|         |                   | 8.68                              | 0.52             | 0.37 | 1.49       |
|         |                   | 6.92                              | 0.52             | 0.38 | 1.39       |
| 7 mg/mL | 1000              | 6.01                              | 0.51             | 0.40 | 1.27       |
|         |                   | 7.06                              | 0.49             | 0.33 | 1.19       |
|         |                   | 7.58                              | 0.50             | 0.29 | 1.15       |



Table S3. Photovoltaic parameters for 2

| Conc.    | Spin coating(rpm) | $J_{sc}$ (mA/cm <sup>2</sup> ) | $V_{oc}$ (mV) | FF   | PCE (%) |
|----------|-------------------|--------------------------------|---------------|------|---------|
|          |                   |                                |               |      |         |
| 3 mg/mL  | 1000              | 10.5                           | 0.6           | 0.42 | 2.71    |
|          |                   | 9.38                           | 0.6           | 0.42 | 2.38    |
|          |                   | 9.5                            | 0.6           | 0.45 | 2.59    |
| 5 mg/mL  | 1000              | 7.41                           | 0.51          | 0.35 | 1.33    |
|          |                   | 6.93                           | 0.50          | 0.34 | 1.20    |
|          |                   | 7.85                           | 0.49          | 0.30 | 1.19    |
| 7 mg/ mL | 1000              | 5.78                           | 0.51          | 0.30 | 0.89    |
|          |                   | 5.45                           | 0.47          | 0.31 | 0.85    |
|          |                   | 4.77                           | 0.42          | 0.33 | 0.68    |

Table S4. Photovoltaic parameters for 3

| Conc.    | Spin coating(rpm) | $J_{sc}$ (mA/cm <sup>2</sup> ) | $V_{oc}$ (mV) | FF   | PCE (%) |
|----------|-------------------|--------------------------------|---------------|------|---------|
|          |                   |                                |               |      |         |
| 3 mg/mL  | 1000              | 10.7                           | 0.54          | 51.2 | 3.00    |
|          |                   | 10.8                           | 0.52          | 54.4 | 3.09    |
|          |                   | 9.35                           | 0.54          | 54.4 | 2.73    |
| 5 mg/mL  | 1000              | 8.61                           | 0.49          | 31.8 | 1.37    |
|          |                   | 7.47                           | 0.50          | 36.4 | 1.36    |
|          |                   | 8.57                           | 0.48          | 28.9 | 1.20    |
| 7 mg/ mL | 1000              | 6.73                           | 0.43          | 30.4 | 0.88    |
|          |                   | 6.28                           | 0.42          | 27.3 | 0.72    |
|          |                   | 5.72                           | 0.43          | 34.0 | 0.84    |

Table S5. Photovoltaic parameters for 4

| Conc.    | Spin coating(rpm) | $J_{sc}$ (mA/cm <sup>2</sup> ) | $V_{oc}$ (mV) | FF   | PCE (%) |
|----------|-------------------|--------------------------------|---------------|------|---------|
|          |                   |                                |               |      |         |
| 3 mg/mL  | 1000              | 10.76                          | 0.55          | 44.8 | 2.69    |
|          |                   | 10.14                          | 0.51          | 46.0 | 2.39    |
|          |                   | 10.86                          | 0.51          | 51.1 | 2.55    |
| 5 mg/mL  | 1000              | 8.69                           | 0.52          | 35.8 | 1.63    |
|          |                   | 8.04                           | 0.52          | 38.1 | 1.62    |
|          |                   | 8.67                           | 0.51          | 35.4 | 1.58    |
| 7 mg/ mL | 1000              | 7.88                           | 0.52          | 33.6 | 1.38    |
|          |                   | 8.08                           | 0.52          | 34.1 | 1.44    |
|          |                   | 6.96                           | 0.52          | 37.2 | 1.35    |

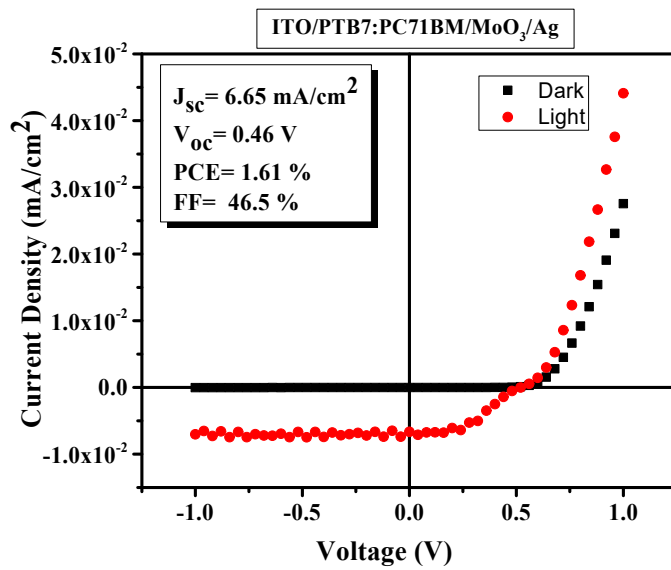

Figure S20. J-V characteristic for inverted organic solar cell device fabricated without ETL.
